# Supplementary material for: Psychopathologic Profiles and Clusters in Tertiary Clinic Referred Patients with Adult Attention Deficit Hyperactivity Disorder: A Person-Centered Analysis
Source: PubMed Central journal article supplement — Psychiatry Investig. 2021 Apr 25;18(4):304–11. doi: 10.30773/pi.2020.0331 (PMC8103025; doi:10.30773/pi.2020.0331), 2021-04-25
Supplement: pi-2020-0331-suppl1.pdf [file pi-2020-0331-suppl1.pdf]

**Supplementary Table 1.** Factor analysis of self-reported emotional symptoms

| Variables                                     | Value  |
|-----------------------------------------------|--------|
| Self-reported depressive and anxiety symptoms |        |
| BDI-II                                        | 0.8700 |
| ASI-3 Cognitive                               | 0.8252 |
| BAI                                           | 0.8025 |
| APPQ Social                                   | 0.7624 |
| ASI-3 Social                                  | 0.7541 |
| LSAS                                          | 0.7441 |
| OCIR                                          | 0.7433 |
| PSWQ                                          | 0.7279 |
| ASI-3 Physical                                | 0.7196 |
| APPQ Intero                                   | 0.7079 |
| APPQ Agora                                    | 0.7000 |
| BHS                                           | 0.6019 |
| Self-reported hypomania                       |        |
| MDQ1                                          | 0.7330 |
| HCL32                                         | 0.7214 |

BDI-II: Beck Depression Inventory II, ASI3: Anxiety Sensitivity Index-3, ASI-3 physical: ASI-3 physical concerns subscale, ASI-3 social: ASI-3 social concerns subscale, ASI-3 cognitive: ASI-3 cognitive concerns subscale, BAI: Beck's Anxiety Inventory, APPQ: Albany Panic and Phobia Questionnaire, APPQ agora: APPQ agoraphobia subscale, APPQ social: APPQ social phobia subscale, APPQ intero: APPQ interoceptive fear subscale, LSAS: Liebowitz Social Anxiety Scale, OCIR: Obsessive Compulsive Inventory-Revised, PSWQ: Penn State Worry Questionnaire, BHS: Beck Hopelessness Scale, MDQ: Mood Disorder Questionnaire, HCL32: Hypomania Symptom Checklist-32
