# Supplementary material for: Psychopathologic Profiles and Clusters in Tertiary Clinic Referred Patients with Adult Attention Deficit Hyperactivity Disorder: A Person-Centered Analysis
Source: PubMed Central journal article supplement — Psychiatry Investig. 2021 Apr 25;18(4):304–11. doi: 10.30773/pi.2020.0331 (PMC8103025; doi:10.30773/pi.2020.0331), 2021-04-25
Supplement: pi-2020-0331-suppl2.pdf [file pi-2020-0331-suppl2.pdf]

**Supplementary Table 2.** Factor analysis of comorbid diagnosis

| Variables            | Values  |
|----------------------|---------|
| Bipolar disorder*    | 0.9761  |
| Anxiety disorder†    | 0.8220  |
| Alcohol use disorder | -0.8404 |

Major depressive disorder was removed due to high correlation.  
\*Including bipolar disorder I, II and not otherwise specified, †Including panic disorder, social anxiety disorder, social phobia, agoraphobia, generalized anxiety disorder
