# Supplementary material for: Psychopathologic Profiles and Clusters in Tertiary Clinic Referred Patients with Adult Attention Deficit Hyperactivity Disorder: A Person-Centered Analysis
Source: PubMed Central journal article supplement — Psychiatry Investig. 2021 Apr 25;18(4):304–11. doi: 10.30773/pi.2020.0331 (PMC8103025; doi:10.30773/pi.2020.0331), 2021-04-25
Supplement: pi-2020-0331-suppl3.pdf [file pi-2020-0331-suppl3.pdf]

**Supplementary Table 3.** Detailed DSM comorbid diagnoses

|                               | Group 1  | Group 2  | Group 3   |
|-------------------------------|----------|----------|-----------|
| Panic disorder                | 0 (0.0)  | 0 (0.0)  | 5 (13.2)  |
| Social phobia                 | 5 (17.2) | 2 (20.0) | 7 (18.4)  |
| Agoraphobia                   | 0 (0.0)  | 0 (0.0)  | 3 (7.9)   |
| Specific phobia               | 1 (3.5)  | 0 (0.0)  | 0 (0.0)   |
| Generalized anxiety disorder  | 7 (24.1) | 1 (10.0) | 12 (31.6) |
| Obsessive compulsive disorder | 2 (6.9)  | 0 (0.0)  | 3 (7.9)   |
| Somatoform disorder           | 0 (0.0)  | 0 (0.0)  | 2 (5.3)   |
| Posttraumatic stress disorder | 0 (0.0)  | 0 (0.0)  | 1 (2.6)   |
| Eating disorder               | 2 (6.9)  | 0 (0.0)  | 0 (0.0)   |
| Alcohol use disorder          | 6 (20.7) | 1 (10.0) | 7 (18.4)  |
